# Supplementary material for: Human IL-6 fosters long-term engraftment of patient-derived disease-driving myeloma cells in immunodeficient mice
Source: PubMed Central journal article supplement (PMC11141932; doi:10.1172/jci.insight.177300), 2024-05-07
Supplement: jciinsight-9-177300-s164.pdf [file jciinsight-9-177300-s164.pdf]

Supplemental Information:

Supplemental Table1: Reagent Specifics

|                                 | <b>Vendor</b>    | <b>Product ID</b> | <b>Assay</b>     |
|---------------------------------|------------------|-------------------|------------------|
| Primers                         |                  |                   |                  |
| F-GGGAGAGCCAGAACACAGA           | transnetyx       | hIL-6             | genotyping       |
| R-TGCAGCTTAGGTCGTCATTG          | transnetyx       | hIL-6             | genotyping       |
| Antibodies                      |                  |                   |                  |
| OKT3                            | Thermo           | 16-0037-81        | T-cell depletion |
| anti human total Ig - unlabeled | Southern Biotech | 2010-01           | ELISA            |
| anti human total Ig-Biotin      | Southern Biotech | 2010-08           | ELISA            |
| anti human IgG - Biotin         | Southern Biotech | 2040-08           | ELISA            |
| anti human IgM - Biotin         | Southern Biotech | 9020-08           | ELISA            |
| anti human IgA - Biotin         | Southern Biotech | 2050-08           | ELISA            |
| streptavidin-HRP                | Biolegend        | 405210            | ELISA            |
| mouse anti human CD138          | BioRad           | MCA2459T          | IHC              |
| mouse anti human kappa          | BioRad           | 5268-6010         | IHC              |
| anti mouse Ig HRP               | Biolegend        | 405306            | IHC              |
| anti mouse CD45.1               | Biolegend        | 110703            | Flow cytometry   |
| Streptavidin BUV 661            | BD biosciences   | 612979            | Flow cytometry   |
| anti human CD138 BUV737         | BD biosciences   | 612834            | Flow cytometry   |
| anti human CD19 BUV805          | BD biosciences   | 742007            | Flow cytometry   |
| anti human CD38 BV421           | Biolegend        | 356617            | Flow cytometry   |
| LiveDead Aqua                   | Thermo           | L34957            | Flow cytometry   |
| anti human CD47 BV605           | Biolegend        | 323119            | Flow cytometry   |
| anti human CD20 BV650           | Biolegend        | 302335            | Flow cytometry   |
| anti human Ki67 BV711           | Biolegend        | 350515            | Flow cytometry   |
| anti human CD27 BV785           | Biolegend        | 302831            | Flow cytometry   |
| anti human IgL AF488            | Southern Biotech | 9180-30           | Flow cytometry   |
| anti human CD45 PerCP-Cy5.5     | Biolegend        | 368503            | Flow cytometry   |
| anti human CD269 (BCMA) PE      | Biolegend        | 357503            | Flow cytometry   |
| anti human CD24 PE-CF594        | BD biosciences   | 562405            | Flow cytometry   |
| anti human CD200 PE-Cy7         | Biolegend        | 329211            | Flow cytometry   |
| anti human IgK APC              | Southern Biotech | 9230-11           | Flow cytometry   |
| anti human CD56 AF700           | Biolegend        | 362521            | Flow cytometry   |
| anti human CD14 APC-Cy7         | Biolegend        | 367107            | Flow cytometry   |
